# Supplementary material
Source: publisher figshare collection journal article supplement (https://karger.figshare.com/ndownloader/files/30773890)
Supplement: Supplementary file 1 [file 30773890]

Supplement Table 1 Multivariable analysis of association between DR and death using different Cox models

| Variables | Adjusted confounders | HR (95%CI) | p |
| --- | --- | --- | --- |
| Model1 | Age | 3.036 (2.125, 4.338) | <0.001 |
| Model2 | Age, gender | 3.313 (2.317, 4.737) | <0.001 |
| Model3 | Age, diabetes | 2.622 (1.490, 4.615) | <0.001 |
| Model4 | Age, FBG | 2.202 (1.403, 3.457) | <0.001 |
| Model5 | Age, gender, diabetes, FBG | 2.298 (1.296, 4.076) | 0.005 |

DR: diabetic retinopathy; FBG: Fasting blood glucose; HR: Hazard ratio; CI: confidence interval

Dependent variable: Six-year mortality.
